# The Effects of Mild Perioperative Hypothermia on Blood Loss and Transfusion Requirement

Suman Rajagopalan, M.D.,\* Edward Mascha, Ph.D.,† Jie Na, M.S.,‡ Daniel I. Sessler, M.D.§

**Background:** Anesthetic-induced hypothermia is known to reduce platelet function and impair enzymes of the coagulation cascade. The objective of this meta-analysis and systematic review was to evaluate the hypothesis that mild perioperative hypothermia increases surgical blood loss and transfusion requirement.

**Methods:** The authors conducted a systematic search of published randomized trials that compared blood loss and/or transfusion requirements in normothermic and mildly hypothermic (34–36°C) surgical patients. Results are expressed as a ratio of the means or relative risks and 95% confidence intervals (CI);  $P < 0.05$  was considered statistically significant.

**Results:** Fourteen studies were included in analysis of blood loss, and 10 in the transfusion analysis. The median (quartiles) temperature difference between the normothermic and hypothermic patients among studies was 0.85°C (0.60°C versus 1.1°C). The ratio of geometric means of total blood loss in the normothermic and hypothermic patients was 0.84 (0.74 versus 0.96),  $P = 0.009$ . Normothermia also reduced transfusion requirement, with an overall estimated relative risk of 0.78 (95% CI 0.63, 0.97),  $P = 0.027$ .

**Conclusion:** Even mild hypothermia (<1°C) significantly increases blood loss by approximately 16% (4–26%) and increases the relative risk for transfusion by approximately 22% (3–37%). Maintaining perioperative normothermia reduces blood loss and transfusion requirement by clinically important amounts.

ANESTHETIC-induced thermoregulatory impairment<sup>1–3</sup> produces hypothermia in unwarmed surgical patients. Hypothermia results initially from an internal core-to-peripheral redistribution of body heat<sup>4,5</sup> and subsequently from heat loss exceeding metabolic heat production.<sup>6</sup> Prospective randomized trials indicate that even mild hypothermia (approximately 2°C) causes severe complications including morbid myocardial outcomes,<sup>7,8</sup> surgical wound infection,<sup>9,10</sup> prolonged recovery<sup>11</sup> and

hospitalization,<sup>9</sup> negative nitrogen balance,<sup>12</sup> shivering,<sup>13</sup> and thermal discomfort.<sup>14</sup>

Hypothermia also impairs platelet function, primarily by impairing release of thromboxane A<sub>2</sub>, which is necessary for formation of an initial platelet plug.<sup>15,16</sup> Hypothermia also impairs function of enzymes in the coagulation cascade. This effect is often unrecognized clinically because coagulation tests are normally performed at 37°C, irrespective of the patient's actual core temperature. When various *in vitro* tests are performed at various temperatures, however, impairment is obvious.<sup>17–22</sup>

Whether mild perioperative hypothermia causes a clinically important coagulopathy remains controversial. An initial study that specifically evaluated this question found that hypothermia increases both blood loss and transfusion requirement.<sup>23</sup> However, a subsequent similar study reported that hypothermia increased neither.<sup>24</sup> Since then, various studies have reported that mild hypothermia increases blood loss and/or transfusion requirement,<sup>25–31</sup> does neither,<sup>7,32–34</sup> or even reduces blood loss.<sup>35</sup> We thus present a systematic review and meta-analysis evaluating the hypothesis that mild perioperative hypothermia increases surgical blood loss and transfusion requirement.

## Materials and Methods

We conducted a systematic search for published, randomized, controlled trials that compared normothermic patients with those who had mild intraoperative hypothermia (34–36°C). Among these studies, only trials that reported blood loss, transfusion requirement, or both as an outcome were included in the analysis. Studies in which average core temperature decreased to less than 34°C or in which local cooling was used to decrease bleeding from the surgical site were excluded. Trials with sample sizes smaller than 15 were also excluded. Two authors independently scrutinized each published report and selected those to be included in the analysis using the above criteria.

The medical literature published since 1966 was searched in all languages using electronic databases. The initial search included the MEDLINE (1966–2006), PubMed, and Cochrane library (2006) databases. The search commands used individually and in various combinations included “intraoperative,” “perioperative,” “normothermia,” “hypothermia,” “blood loss,” “transfusion,” and “complications.” The bibliographies of the retrieved articles were reviewed for additional relevant studies. Our last electronic search was in October 2006.

This article is featured in “This Month in Anesthesiology.” Please see this issue of ANESTHESIOLOGY, page 5A.

\* Anesthesia Resident, Division of Anesthesia, Critical Care, and Comprehensive Pain Management, † Staff Biostatistician, Departments of Quantitative Health Sciences and OUTCOMES RESEARCH, ‡ Statistical Programmer, Department of Quantitative Health Sciences, § Chair, Department of OUTCOMES RESEARCH, Cleveland Clinic, Cleveland, Ohio.

Received from the Department of OUTCOMES RESEARCH, Cleveland Clinic, Cleveland, Ohio. Submitted for publication April 5, 2007. Accepted for publication September 28, 2007. Supported by National Institutes of Health Grant GM 061655 (Bethesda, Maryland) and the Joseph Drown Foundation (Los Angeles, California). The study sponsors were not involved in the design of the study; the collection, analysis, or interpretation of the data; or the preparation of the manuscript. None of the authors has a personal financial interest related to this research.

Address correspondence to Dr. Sessler: Department of OUTCOMES RESEARCH, Cleveland Clinic, P77, Cleveland, OH 44195. ds@or.org. On the World Wide Web: www.or.org. This article may be accessed for personal use at no charge through the Journal Web site, www.anesthesiology.org.

The information obtained from the studies included the number of patients, American Society of Anesthesiologists physical status if available, type of surgery and anesthetic used, operating room temperature, patient's core body temperature at the end of surgery ( $T_{\text{Core}}$ ), amount of blood loss, number of patients receiving transfusion, and the transfusion requirements. The extracted data included the intraoperative blood loss and the total amount of blood loss if it was mentioned in the trial. When possible, authors were contacted to request missing information.

Traditional meta-analysis methods were used to assess the comparative effect of normothermia *versus* hypothermia on both total blood loss and whether a patient received any transfusion. We analyzed total blood loss under the assumption that loss follows a log-normal distribution, with the raw data being skewed to the right, as this is the usual experience with blood loss data. Blood loss was reported as mean  $\pm$  SD in 9 of the 14 studies,<sup>23–26,28,30,32–34</sup> as median and range in 2 studies,<sup>27,31</sup> and as mean  $\pm$  SE in 3 studies.<sup>7,29,35</sup> We converted these summary statistics to the mean (SD) of the log-transformed blood loss that would be expected under the log-normal distribution.<sup>36</sup> Specifically, the log-transformed mean and SD, say  $\mu$  and  $\sigma$ , were estimated as

$$\mu = \log\left(\frac{(\text{MeanX})^2}{\sqrt{(\text{SDX})^2 + (\text{MeanX})^2}}\right),$$

$$\sigma = \sqrt{\log\left[\left(\frac{\text{SDX}}{\text{MeanX}}\right)^2 + 1\right]},$$

where MeanX and SDX are the mean and SD of the untransformed data, respectively. The effect of normothermic *versus* hypothermic temperature was then summarized as the ratio of normothermic to hypothermic mean blood loss for each study and overall, where a ratio of 1.0 indicates no association. Because of the log scale, the reported effect size is actually the ratio of geometric means. Our use of the ratio of means instead of the difference in means allows intuitive comparison of studies with quite differing volumes of blood loss.

We used a random effects (instead of fixed effects) meta-analysis method for each outcome because we were interested in generalizing beyond the included studies.<sup>37</sup> Heterogeneity of the treatment effects was assessed for each meta-analysis using the Q statistic and associated *P* value. Because of the relatively high proportion of zeros, or patients with no transfusion, the amount of transfused blood was not normally or even log-normally distributed in the studies considered. Therefore, instead of using the observed amount of transfused blood, we performed a meta-analysis on the relative risk of any transfusion *versus* no transfusion in the normothermic *versus* hypothermic patients. A relative risk less than 1.0 indicates that the estimated risk of

transfusion is less for those in the normothermic *versus* those in the hypothermic groups.

Publication bias was assessed using funnel plots, which are plots of the SE *versus* the observed treatment effects and their 95% confidence intervals (CIs). Standard error has been shown to be the best variable to plot against the treatment effect in funnel plots for most types of meta-analyses.<sup>38</sup> A vertical line indicates the summary treatment effect. Diagonal lines form a funnel that expands as SE increases (and thus as the sample size decreases) and indicates the expected 95% CI width ( $\pm 1.96$  SE) for each SE on the vertical axis. In the absence of heterogeneity, 95% of estimated treatment effects (not their CIs) are expected to fall within the funnel. Symmetry indicates lack of publication bias.

We calculated and reported quality scores and their individual items to give a rough description of the relative quality of the included studies. A formal incorporation of the quality scores into our meta-analysis was not performed because of the problems with quality scores in general, including bias and subjectivity.<sup>39</sup> We did, however, assess whether there was an obvious correlation between the estimated treatment effects and the quality scores. Our meta-analysis does account for the size of each study by inverse weighting on the variance, as is customary.

A quality score for each blood loss study was formed by adding points for the following factors: whether blood loss was a primary outcome (3 points if yes, 0 otherwise); whether an objective measure of blood loss was used (2 points if yes, 0 otherwise); whether method of randomization was specified (1 point if yes, 0 otherwise); and whether intent-to-treat analysis methodology was specified or implied (1 point if yes, 0 otherwise) for a possible range of 0 to 7 quality points.

As an additional analysis, because there was naturally some degree of variability in the within-study mean temperature difference among studies, we assessed the correlation between this difference (*e.g.*, mean temperature for normothermic and hypothermic groups) and the resulting blood loss treatment effect using Pearson correlation weighted for study size. R statistical software (R Foundation for Statistical Computing, Vienna, Austria) was used for all analyses. The significance level for each hypothesis was 0.05.

## Results

Our initial search of the electronic databases using key words retrieved approximately 1,800 articles. Among these, we excluded from the analysis retrospective studies or those in which the core temperature reduced to less than 34°C, local cooling methods had been used, or the sample size was smaller than 15. We found a total of 18 studies that met our criteria. Fifteen trials reported

**Table 1. Summary of Total Blood Loss Literature Review**

| Reference                             | Type of Surgery         | Patients (n) |     | T <sub>core</sub> (°C) |            | Blood Loss (ml)   |                   | Reported P Value   |
|---------------------------------------|-------------------------|--------------|-----|------------------------|------------|-------------------|-------------------|--------------------|
|                                       |                         | NT           | HT  | NT                     | HT         | NT                | HT                |                    |
| Schmied <i>et al.</i> <sup>23</sup>   | Hip arthroplasty        | 30           | 30  | 36.6 ± 0.4             | 35.0 ± 0.5 | 1670 ± 320        | 2150 ± 550        | <0.001             |
| Winkler <i>et al.</i> <sup>31*</sup>  | Hip arthroplasty        | 75           | 75  | 36.5 ± 0.5             | 36.0 ± 0.4 | 1531 (1055, 1746) | 1678 (1366, 1965) | 0.031              |
| Widman <i>et al.</i> <sup>30</sup>    | Hysterectomy            | 29           | 29  | Δ0.4 ± 0.3             | Δ0.9 ± 0.4 | 923 ± 410         | 1068 ± 482        | 0.048 <sup>c</sup> |
| Persson <i>et al.</i> <sup>29†</sup>  | Hysterectomy            | 29           | 30  | 36.8 ± 0.1             | 35.8 ± 0.1 | 186 ± 27          | 308 ± 47          | <0.05              |
| Hofer <i>et al.</i> <sup>26</sup>     | Off pump CABG           | 22           | 24  | 36.8 ± 0.1             | 35.8 ± 0.1 | 1497 ± 497        | 2300 ± 788        | <0.001             |
| Bock <i>et al.</i> <sup>25</sup>      | Major abdominal surgery | 20           | 20  | Δ0.5 ± 0.8             | Δ1.5 ± 0.8 | 635 ± 507         | 1070 ± 802        | <0.05              |
| Johansson <i>et al.</i> <sup>24</sup> | Hip arthroplasty        | 25           | 25  | 36.5 ± 0.8             | 35.4 ± 0.9 | 1047 ± 413        | 1066 ± 441        | 0.88‡              |
| Smith <i>et al.</i> <sup>35†</sup>    | Major surgery           | 31           | 30  | 36.7 ± 0.1             | 36.1 ± 0.1 | 423 ± 101         | 159 ± 49          | <0.05              |
| Frank <i>et al.</i> <sup>7†</sup>     | Major surgery           | 142          | 158 | 36.7 ± 0.1             | 35.4 ± 0.1 | 390 ± 70          | 520 ± 60          | 0.16               |
| Mason <i>et al.</i> <sup>28</sup>     | Gastric bypass          | 32           | 32  | 36.3                   | 35.7       | 111 ± 40          | 157 ± 73          | <0.01              |
| Casati <i>et al.</i> <sup>32</sup>    | Hip arthroplasty        | 25           | 25  | 36.3                   | 35.7       | 470 ± 170         | 442 ± 216         | >0.05              |
| Murat <i>et al.</i> <sup>33</sup>     | Spine surgery           | 26           | 25  | 36.5 ± 0.8             | 35.4 ± 0.9 | 160 ± 61          | 161 ± 100         | >0.05              |
| Hohn <i>et al.</i> <sup>27*</sup>     | Cardiac                 | 43           | 43  | 36.0 ± 0.4             | 35.3 ± 0.4 | 660 (230, 1870)   | 956 (340, 5480)   | <0.05              |
| Nathan <sup>34</sup>                  | Cardiac                 | 73           | 71  | 36.7 ± 0.4             | 34.3 ± 0.4 | 596 ± 356         | 666 ± 405         | 0.28               |

Data reported as mean ± SD except as noted.

\* Data reported as median (min, max). † Data reported as mean ± SEM. ‡ P value calculated from summary data.

CABG = coronary artery bypass graft; HT = hypothermic; NT = normothermic.

blood loss, of which seven reported only intraoperative loss,<sup>7,25,28,29,32,33,35</sup> two reported only postoperative loss,<sup>27,34</sup> and five reported both intraoperative and total loss.<sup>23,24,26,30,31</sup> One study was excluded from the analysis because of inconsistent reporting of results.<sup>40</sup> Thirteen studies compared transfusion requirements in normothermic *versus* hypothermic patients. Three trials were excluded<sup>7,8,41</sup> because there was no mention of the number of patients requiring transfusion. Hence, 14 studies were included in analysis of blood loss whereas 10 studies were included in the transfusion analysis.<sup>9,23–27,30,31,34,35</sup>

Pertinent summary statistics are given in tables 1 and 2 for studies included in the meta-analysis of total blood loss and transfusion, respectively. The respective blood loss and transfusion studies evaluated a total of 1,219 and 985 patients. The median (quartiles) of the mean temperatures reported for patients in the normothermic

groups among the 14 blood loss studies was approximately 36.6°C (36.4°C, 36.7°C), whereas it was 35.6°C (35.4°C, 35.8°C) in patients assigned to hypothermia. The median (quartiles) temperature difference between the normothermic and hypothermic studies was only 0.85°C (0.60°C, 1.1°C). A summary of the quality scores for the studies that were included in the total blood loss meta-analysis is given in table 3. Quality scores and the items used to create them were not included in the meta-analysis and are reported as a means of summarizing and comparing the rigor of the various included studies. Quality score was not correlated with the observed effect size (Pearson correlation [95% CI] 0.30 [–0.27, 0.72], *P* = 0.30). Meta-analysis results are given in figures 1 and 2, with summary statistics for each study and the overall result, and including a forest plot depicting the effect of interest. Effect sizes for total blood loss

**Table 2. Summary of Transfusion Literature Review**

| Reference                             | Patients (n) |    | Any Transfusion (%) |    | T <sub>core</sub> (°C) |            | Transfusion (ml) |                 | Reported P Value |
|---------------------------------------|--------------|----|---------------------|----|------------------------|------------|------------------|-----------------|------------------|
|                                       | NT           | HT | NT                  | HT | NT                     | HT         | NT               | HT              |                  |
| Schmied <i>et al.</i> <sup>23</sup>   | 30           | 30 | 1                   | 7  | 36.6 ± 0.4             | 35.0 ± 0.5 | 10 ± 55          | 80 ± 154        | 0.02             |
| Winkler <i>et al.</i> <sup>31*</sup>  | 75           | 75 | 29                  | 40 | 36.5 ± 0.5             | 36.0 ± 0.4 | 289 ± 408        | 401 ± 470       | 0.058            |
| Widman <i>et al.</i> <sup>30</sup>    | 29           | 29 | 9                   | 11 | Δ0.4 ± 0.3             | Δ0.9 ± 0.4 | 190 ± 220        | 290 ± 330       | >0.05            |
| Hofer <i>et al.</i> <sup>26</sup>     | 22           | 24 | 5                   | 11 | 36.5 ± 0.4             | 35.6 ± 0.8 | 155 ± 285        | 530 ± 689       | 0.048            |
| Bock <i>et al.</i> <sup>25</sup>      | 20           | 20 | 3                   | 9  | Δ0.5 ± 0.8             | Δ1.5 ± 0.8 | 95 ± 293         | 502 ± 754       | <0.05            |
| Johansson <i>et al.</i> <sup>24</sup> | 25           | 25 | 15                  | 13 | 36.9 ± 0.5             | 36.0 ± 0.7 | 490 ± 490        | 525 ± 595       | >0.05            |
| Smith <i>et al.</i> <sup>35*</sup>    | 31           | 30 | 2                   | 1  | 36.7 ± 0.1             | 36.1 ± 0.1 | 525 ± 175        | 700‡            | >0.05            |
| Hohn <i>et al.</i> <sup>27†</sup>     | 43           | 43 | 17                  | 18 | 36.0 ± 0.4             | 35.3 ± 0.4 | 548 (190, 1500)  | 566 (100, 2050) | >0.05            |
| Nathan <i>et al.</i> <sup>34</sup>    | 73           | 71 | 23                  | 24 | 36.7 ± 0.4             | 34.3 ± 0.4 | 245 ± 490        | 245 ± 420       | 0.76             |
| Kurz <i>et al.</i> <sup>9</sup>       | 104          | 96 | 23                  | 34 | 36.6 ± 0.5             | 34.7 ± 0.6 | 140 ± 350        | 280 ± 420       | <0.01            |

Data are reported as mean ± SD unless noted otherwise.

\* Data reported as mean ± SEM. † Data reported as median (min, max). ‡ Only one patient.

HT = hypothermic; NT = normothermic.



Table 3. Quality Scores for Blood Loss Studies

| Reference                             | Method of Randomization | Intent to Treat | Blood Loss Primary Outcome | Objective Measure of Blood Loss | Quality Score* |
|---------------------------------------|-------------------------|-----------------|----------------------------|---------------------------------|----------------|
| Schmied <i>et al.</i> <sup>23</sup>   | 1                       | 1               | 3                          | 2                               | 7              |
| Winkler <i>et al.</i> <sup>31</sup>   | 1                       | 1               | 3                          | 2                               | 7              |
| Widman <i>et al.</i> <sup>30</sup>    | 1                       |                 | 3                          | 2                               | 6              |
| Persson <i>et al.</i> <sup>29</sup>   | 1                       | 1               |                            | 2                               | 2              |
| Hofer <i>et al.</i> <sup>26</sup>     | 1                       |                 |                            | 2                               | 3              |
| Bock <i>et al.</i> <sup>25</sup>      |                         | 1               |                            |                                 | 1              |
| Johansson <i>et al.</i> <sup>24</sup> | 1                       | 1               | 3                          | 2                               | 7              |
| Smith <i>et al.</i> <sup>35</sup>     |                         |                 |                            |                                 | 0              |
| Frank <i>et al.</i> <sup>7</sup>      | 1                       | 1               |                            |                                 | 2              |
| Mason <i>et al.</i> <sup>28</sup>     | 1                       | 1               |                            |                                 | 2              |
| Casati <i>et al.</i> <sup>32</sup>    | 1                       | 1               |                            |                                 | 2              |
| Murat <i>et al.</i> <sup>33</sup>     |                         | 1               |                            | 2                               | 3              |
| Hohn <i>et al.</i> <sup>27</sup>      |                         |                 |                            | 2                               | 2              |
| Nathan <i>et al.</i> <sup>34</sup>    | 1                       | 1               |                            | 2                               | 4              |

\* Correlation between observed effect size and the quality score nonsignificant ( $P = 0.30$ ).

were found to be heterogeneous across studies ( $Q = 62.3$ ,  $P < 0.001$ ), indicating significant variability among the studies, whereas transfusion effect sizes were more homogeneous ( $Q = 11.4$ ,  $P = 0.25$ ). The estimated ratio of geometric means of total blood loss (95% CI) in the normothermic *versus* hypothermic groups was 0.84 (0.74, 0.96),  $P = 0.009$ . Our results thus indicate that normothermia is associated with significantly lower blood loss than hypothermia, at least for the aggregate types of surgeries considered and for normothermia and hypothermia as defined in these studies. Normothermia as defined in these studies is also associated with a reduced need for transfusion compared with hypothermia, with overall estimated relative risk of 0.78 (95% CI 0.63, 0.97),  $P = 0.027$ .

The funnel plots in figures 3 and 4 do not indicate substantial publication bias for either total blood loss or transfusion, although potential bias is difficult to evaluate with the moderate number of studies in this meta-

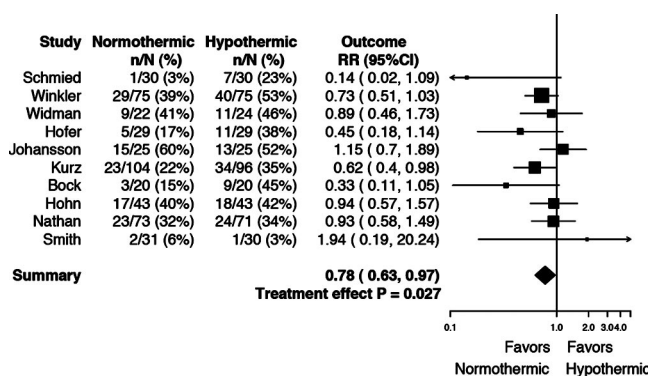

Fig. 2. Transfusion meta-analysis and forest plot. Treatment effect is expressed as the relative risk (RR) of transfusion in normothermic *versus* hypothermic patients. Normothermia is associated with 22% less risk of transfusion than hypothermia (95% CI 3%, 37%),  $P = 0.027$ . n = number transfused; N = number of patients.

analysis. However, some publication bias for smaller studies is seen by the imbalance in the lower half of each figure. Studies with estimated effects outside the funnel are evidence of heterogeneity for blood loss (fig. 3), as noted above, whereas the transfusion effects are more homogeneous (fig. 4).

Among the three coronary artery bypass graft studies included in the meta-analysis, two<sup>26,34</sup> did not use cooling methods to induce hypothermia during cardiopulmonary bypass. As per randomization, patients were either warmed to normothermia or allowed to develop mild hypothermia. Only in the study by Hohn *et al.*<sup>27</sup> were the patients actively cooled to 28°C before randomization at the end of cardiopulmonary bypass. The results of the meta-analysis are similar when this study was excluded; the summary ratio of means (95% CI) for total blood loss is 0.85 (0.74, 0.97), and summary relative risk (95% CI) for transfusion is 0.75 (0.59, 0.97).

Finally, there was no observed correlation between the within-study difference in mean temperature and result-

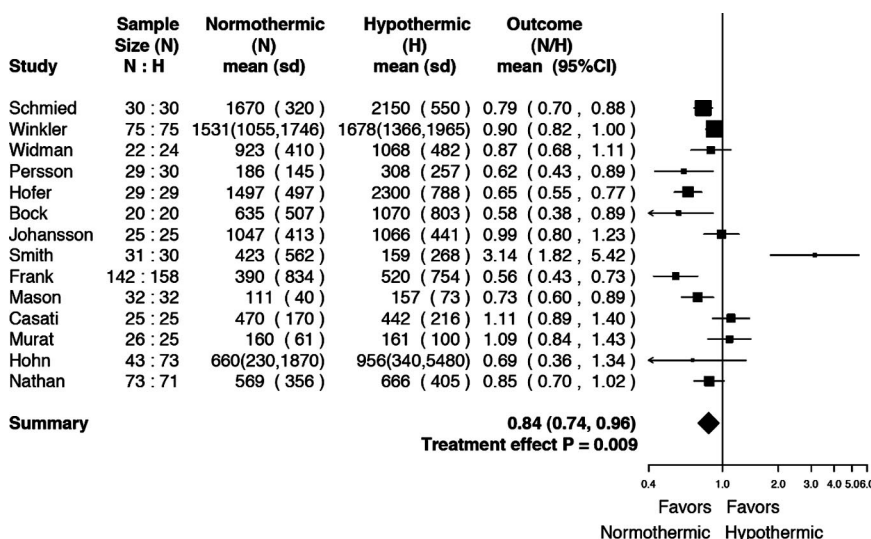

Fig. 1. Total blood loss meta-analysis and forest plot. Treatment effect is expressed as ratio of geometric means of blood loss for normothermic (N) *versus* hypothermic (H) patients. Results indicate an estimated 16% (95% CI 4%, 26%) lower average blood loss in normothermic *versus* hypothermic patients,  $P = 0.009$ .

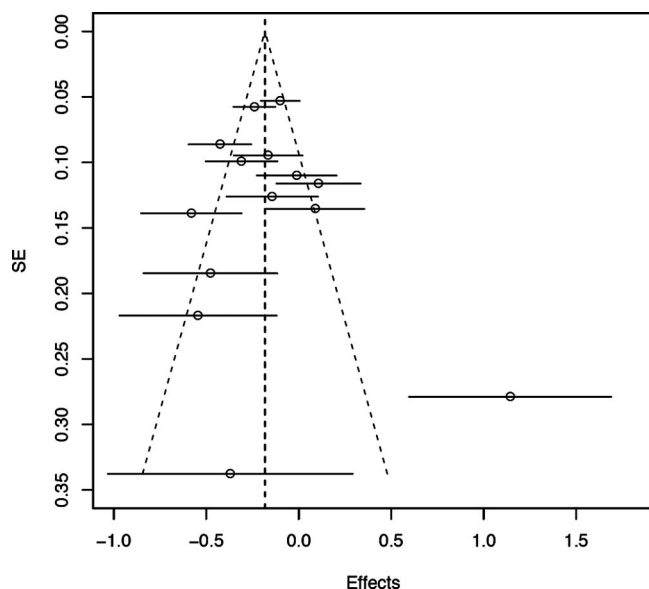

Fig. 3. Total blood loss funnel plot assessing publication bias. Plotted is the standard error (SE) versus the log treatment effect of each study. Vertical line is summary log treatment effect for blood loss (*i.e.*,  $\log [0.84] = -0.17$ ). Diagonal lines are expected 95% confidence interval ( $\pm 1.96$  SE) from the summary log treatment effect. Studies outside the funnel indicate heterogeneity. The fairly symmetric plot indicates low publication bias.

ing blood loss treatment effect, with correlation (95% CI) of  $-0.13$  ( $-0.62$  to  $0.43$ ),  $P = 0.67$ .

## Discussion

A meta-analysis evaluating the effects of hypothermia on blood loss was required because many studies con-

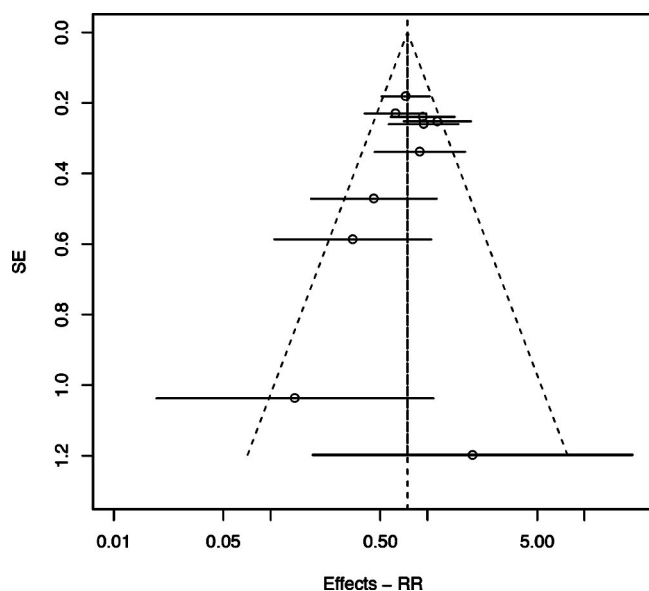

Fig. 4. Transfusion funnel plot assessing publication bias. Plotted is the standard error (SE) versus the relative risk (RR) of each study. Vertical line is summary relative risk (0.78). Diagonal lines are  $\pm 1.96$  SE from the summary relative risk. The fairly symmetric plot indicates low publication bias.

clude that hypothermia impairs coagulation, whereas others conclude that it does not. Our analysis, based on available literature, indicates that even mild hypothermia significantly increases blood loss by an estimated 16% (CI 4–26%). Although not an enormous treatment effect, these data add to other studies that demonstrate that preventing hypothermia decreases the risk of many other complications and is thus indicated for reasons other than reducing blood loss.<sup>7–14</sup>

There is not a simple relationship between blood loss and transfusion requirement. Nonetheless, averaged across a sufficient number of patients and a variety of operations, increased blood loss presumably increases transfusion requirement. Our results are consistent with this theory: mild hypothermia significantly increased the relative risk for transfusion by approximately 22% (CI 3–37%). Reducing transfusion seems especially important now that increasing evidence suggests that transfusions are far more harmful than previously believed.<sup>42–45</sup> Our analysis was restricted to mild hypothermia ( $>34^{\circ}\text{C}$ ), but in fact, the median of the mean temperatures among studies for the patients assigned to hypothermia was approximately  $35.6^{\circ}\text{C}$ , which was only approximately a degree less than the median for the normothermic patients. Hypothermia in the studies we evaluated was thus of a magnitude that is typical for unwarmed surgical patients. Therapeutic hypothermia purposely induced to lower temperature will, presumably, produce yet greater impairment of coagulation.

Unwarmed patients undergoing larger and longer operations are more likely to become hypothermic than those having shorter and smaller procedures. They are also likely to lose more blood. Consequently, retrospective correlations between hypothermia and blood loss are especially likely to be confounded. We therefore restricted our analysis to prospective, randomized trials.

Blood loss and transfusion requirement were the primary outcomes for some of the articles included in our analysis.<sup>23,24,30,31</sup> However, coagulopathy was a secondary or even incidental finding in others.<sup>9,26–29,32–35</sup> This is an important distinction because potential confounding factors are usually only well controlled for the primary outcome. Secondary outcomes may also be suboptimally evaluated. Finally, secondary or incidental findings are often only reported when statistically significant; reported outcomes may thus overestimate the actual effect. Nonetheless, the effects of hypothermia were generally similar in studies in which blood loss and transfusion requirement were primary or secondary outcomes.

Although blood loss typically has a distribution quite skewed to the right and thus not normally distributed, many of the articles in this meta-analysis summarized it as mean  $\pm$  SD and analyzed it using a  $t$  test, which assumes normality. However, from experience, it is clear

that blood loss is closer to the log-normal than the normal distribution, a fact that has been highlighted by others.<sup>24,31</sup> For our meta-analysis, we thus desired a summary mean  $\pm$  SD for each study on the log-transformed scale so that our inference among studies would be more accurate than using nontransformed means and SDs. Assuming a log-normal distribution for the raw data, we used the formulae for the relationship between the nontransformed and transformed mean and SD of a log-normal variable to determine the estimated log-scaled mean  $\pm$  SD for each study. These were then exponentiated (*i.e.*, back-transformed) to obtain the geometric means, and we report the ratio of geometric means as our outcome measure for each study and overall. Reporting the ratio instead of the difference in means allows intuitive comparison of studies with differing volumes of blood loss.

All meta-analyses are based on published results and thus subject to any methodologic problems in the underlying reports. This is not a trivial consideration: even using our relatively crude quality scoring, it is apparent that many of the articles we included failed to meet even the most basic elements of trial design. An additional limitation is publication bias. It is possible, perhaps even probable, that some "negative" results were never published either because the authors abandoned the project or because journals were reluctant to publish negative results. To the extent that this is the case, our analysis will overestimate the coagulopathy of hypothermia. Examination of funnel plots revealed some asymmetry, and thus mild evidence of publication bias, but not strikingly so. The blood loss treatment effects were found to be heterogeneous; this should not be considered a negative finding, but rather evidence that a thorough literature search was done, resulting in studies with wide ranges of effects. More subtle limitations of meta-analyses have been reviewed extensively.<sup>46,47</sup>

It is worth noting that there are many examples of meta-analyses that were proven false by subsequent large trials.<sup>48,49</sup> No meta-analysis, including this one, should be considered a substitute for very large ( $n > 1,000$ ) trials. A difficulty in this case, however, is that hypothermia is causally linked to numerous serious complications. Maintaining normothermia has thus become the standard of care; a consequence is that conducting a large trial in which patients are randomized to perioperative hypothermia would be ethically challenging.

In summary, our meta-analysis indicates that even mild hypothermia ( $<1^\circ\text{C}$ ) increases blood loss and the relative risk of transfusion by small but significant amounts. These data add to the evidence supporting maintenance of normothermia perioperatively.

Nancy Alsip, Ph.D. (University of Louisville, Louisville, Kentucky), edited the manuscript.

## References

1. Xiong J, Kurz A, Sessler DI, Plattner O, Christensen R, Dechert M, Ikeda T: Isoflurane produces marked and nonlinear decreases in the vasoconstriction and shivering thresholds. *ANESTHESIOLOGY* 1996; 85:240-5
2. Annadata R, Sessler DI, Tayefeh F, Kurz A, Dechert M: Desflurane slightly increases the sweating threshold but produces marked, nonlinear decreases in the vasoconstriction and shivering thresholds. *ANESTHESIOLOGY* 1995; 83:1205-11
3. Matsukawa T, Kurz A, Sessler DI, Bjorksten AR, Merrifield B, Cheng C: Propofol linearly reduces the vasoconstriction and shivering thresholds. *ANESTHESIOLOGY* 1995; 82:1169-80
4. Matsukawa T, Sessler DI, Christensen R, Ozaki M, Schroeder M: Heat flow and distribution during epidural anesthesia. *ANESTHESIOLOGY* 1995; 83:961-7
5. Matsukawa T, Sessler DI, Sessler AM, Schroeder M, Ozaki M, Kurz A, Cheng C: Heat flow and distribution during induction of general anesthesia. *ANESTHESIOLOGY* 1995; 82:662-73
6. Hynson JM, Sessler DI: Intraoperative warming therapies: A comparison of three devices. *J Clin Anesth* 1992; 4:194-9
7. Frank SM, Fleisher LA, Breslow MJ, Higgins MS, Olson KF, Kelly S, Beattie C: Perioperative maintenance of normothermia reduces the incidence of morbid cardiac events: A randomized clinical trial. *JAMA* 1997; 277:1127-34
8. Neshor N, Zisman E, Wolf T, Sharony R, Bolotin G, David M, Uretzky G, Pizov R: Strict thermoregulation attenuates myocardial injury during coronary artery bypass graft surgery as reflected by reduced levels of cardiac-specific troponin I. *Anesth Analg* 2003; 96:328-35
9. Kurz A, Sessler DI, Lenhardt R: Perioperative normothermia to reduce the incidence of surgical-wound infection and shorten hospitalization: Study of Wound Infection and Temperature Group. *N Engl J Med* 1996; 334:1209-15
10. Melling AC, Ali B, Scott EM, Leaper DJ: Effects of preoperative warming on the incidence of wound infection after clean surgery: A randomised controlled trial. *Lancet* 2001; 358:876-80
11. Lenhardt R, Marker E, Goll V, Tschernich H, Kurz A, Sessler DI, Narzt E, Lackner F: Mild intraoperative hypothermia prolongs postanesthetic recovery. *ANESTHESIOLOGY* 1997; 87:1318-23
12. Carli F, Clark MM, Woollen JW: Investigation of the relationship between heat loss and nitrogen excretion in elderly patients undergoing major abdominal surgery under general anaesthetic. *Br J Anaesth* 1982; 54:1023-9
13. Just B, Delva E, Camus Y, Lienhart A: Oxygen uptake during recovery following naloxone: Relationship with intraoperative heat loss. *ANESTHESIOLOGY* 1992; 76:60-4
14. Kurz A, Sessler DI, Narzt E, Bekar A, Lenhardt R, Huemer G, Lackner F: Postoperative hemodynamic and thermoregulatory consequences of intraoperative core hypothermia. *J Clin Anesth* 1995; 7:359-66
15. Valeri CR, Feingold H, Cassidy G, Ragno G, Khuri S, Altschule MD: Hypothermia-induced reversible platelet dysfunction. *Ann Surg* 1987; 205:175-81
16. Valeri CR, Khabbaz K, Khuri SF, Marquardt C, Ragno G, Feingold H, Gray AD, Axford T: Effect of skin temperature on platelet function in patients undergoing extracorporeal bypass. *J Thorac Cardiovasc Surg* 1992; 104:108-16
17. Felfernig M, Blaicher A, Kettner SC, Felfernig D, Acimovic S, Kozek-Langenecker SA: Effects of temperature on partial thromboplastin time in heparinized plasma *in vitro*. *Eur J Anaesthesiol* 2001; 18:467-70
18. Gubler KD, Gentilello LM, Hassantash SA, Maier RV: The impact of hypothermia on dilutional coagulopathy. *J Trauma* 1994; 36:847-51
19. Kettner SC, Kozek SA, Groetzner JP, Gonano C, Schellongowski A, Kucera M, Zimpfer M: Effects of hypothermia on thrombelastography in patients undergoing cardiopulmonary bypass. *Br J Anaesth* 1998; 80:313-7
20. Reed RL2nd, Johnson TD, Hudson JD, Fischer RP: The disparity between hypothermic coagulopathy and clotting studies. *J Trauma* 1992; 33:465-70
21. Rohrer MJ, Natale AM: Effect of hypothermia on the coagulation cascade. *Crit Care Med* 1992; 20:1402-5
22. Staab DB, Sorensen VJ, Fath JJ, Raman SB, Horst HM, Obeid FN: Coagulation defects resulting from ambient temperature-induced hypothermia. *J Trauma* 1994; 36:634-8
23. Schmied H, Kurz A, Sessler DI, Kozek S, Reiter A: Mild hypothermia increases blood loss and transfusion requirements during total hip arthroplasty. *Lancet* 1996; 347:289-92
24. Johansson T, Lisander B, Ivarsson I: Mild hypothermia does not increase blood loss during total hip arthroplasty. *Acta Anaesthesiol Scand* 1999; 43:1005-10
25. Bock M, Muller J, Bach A, Bohrer H, Martin E, Motsch J: Effects of preinduction and intraoperative warming during major laparotomy. *Br J Anaesth* 1998; 80:159-63
26. Hofer CK, Worn M, Tavakoli R, Sander L, Maloigne M, Klaghofer R, Zollinger A: Influence of body core temperature on blood loss and transfusion requirements during off-pump coronary artery bypass grafting: A comparison of 3 warming systems. *J Thorac Cardiovasc Surg* 2005; 129:838-43
27. Hohn L, Schweizer A, Kalangos A, Morel DR, Bednarkiewicz M, Licker M: Benefits of intraoperative skin surface warming in cardiac surgical patients. *Br J Anaesth* 1998; 80:318-23
28. Mason DS, Sapala JA, Wood MH, Sapala MA: Influence of a forced air warming system on morbidly obese patients undergoing Roux-en-Y gastric bypass. *Obes Surg* 1998; 8:453-60



29. Persson K, Lundberg J: Perioperative hypothermia and postoperative opioid requirements. *Eur J Anaesthesiol* 2001; 18:679-86
30. Widman J, Hammarqvist F, Sellden E: Amino acid infusion induces thermogenesis and reduces blood loss during hip arthroplasty under spinal anesthesia. *Anesth Analg* 2002; 95:1757-62
31. Winkler M, Akca O, Birkenberg B, Hetz H, Scheck T, Arkilic CF, Kabon B, Marker E, Grubl A, Czupan R, Greher M, Goll V, Gottsauner-Wolf F, Kurz A, Sessler DI: Aggressive warming reduces blood loss during hip arthroplasty. *Anesth Analg* 2000; 91:978-84
32. Casati A, Fanelli G, Ricci A, Musto P, Cedrati V, Altimari G, Baroncini S, Pattono R, Montanini S, Torri G: Shortening the discharging time after total hip replacement under combined spinal/epidural anesthesia by actively warming the patient during surgery. *Miner Anesthesiol* 1999; 65:507-14
33. Murat I, Berniere J, Constant I: Evaluation of the efficacy of a forced-air warmer (Bair Hugger) during spinal surgery in children. *J Clin Anesth* 1994; 6:425-9
34. Nathan HJ, Parlea L, Dupuis JY, Hendry P, Williams KA, Rubens FD, Wells GA: Safety of deliberate intraoperative and postoperative hypothermia for patients undergoing coronary artery surgery: A randomized trial. *J Thorac Cardiovasc Surg* 2004; 127:1270-5
35. Smith CE, Desai R, Glorioso V, Cooper A, Pinchak AC, Hagen KF: Preventing hypothermia: convective and intravenous fluid warming *versus* convective warming alone. *J Clin Anesth* 1998; 10:380-5
36. Johnson N, Kotz S, Balakrishnan N: Continuous Univariate Distributions. New York, John Wiley & Sons, 1994.
37. DerSimonian R, Laird N: Meta-analysis in clinical trials. *Control Clin Trials* 1986; 7:177-88
38. Sterne JA, Egger M: Funnel plots for detecting bias in meta-analysis: Guidelines on choice of axis. *J Clin Epidemiol* 2001; 54:1046-55
39. Greenland S, O'Rourke K: On the bias produced by quality scores in meta-analysis, and a hierarchical view of proposed solutions. *Biostatistics* 2001; 2:463-71
40. Thomas A, Vassiliades JLN Jr, Lonquist JL: Evaluation of a new temperature management system during off-pump coronary artery bypass. *Interactive Cardiovasc Thorac Surg* 2003; 2:454-7
41. Neshet N, Uretzky G, Insler S, Nataf P, Frolkis I, Pineau E, Cantoni E, Bolotin G, Vardi M, Pevni D, Lev-Ran O, Sharony R, Weinbroum AA: Thermo-wrap technology preserves normothermia better than routine thermal care in patients undergoing off-pump coronary artery bypass and is associated with lower immune response and lesser myocardial damage. *J Thorac Cardiovasc Surg* 2005; 129:1371-8
42. Koch CG, Khandwala F, Li L, Estafanous FG, Loop FD, Blackstone EH: Persistent effect of red cell transfusion on health-related quality of life after cardiac surgery. *Ann Thorac Surg* 2006; 82:13-20
43. Koch CG, Li L, Duncan AI, Mihaljevic T, Cosgrove DM, Loop FD, Starr NJ, Blackstone EH: Morbidity and mortality risk associated with red blood cell and blood-component transfusion in isolated coronary artery bypass grafting. *Crit Care Med* 2006; 34:1608-16
44. Koch CG, Li L, Duncan AI, Mihaljevic T, Loop FD, Starr NJ, Blackstone EH: Transfusion in coronary artery bypass grafting is associated with reduced long-term survival. *Ann Thorac Surg* 2006; 81:1650-7
45. Koch CG, Li L, Van Wagoner DR, Duncan AI, Gillinov AM, Blackstone EH: Red cell transfusion is associated with an increased risk for postoperative atrial fibrillation. *Ann Thorac Surg* 2006; 82:1747-56
46. Jadad AR, Cook DJ, Browman GP: A guide to interpreting discordant systematic reviews. *CMAJ* 1997; 156:1411-6
47. Kranke P, Apfel CC, Eberhart LH, Georgieff M, Roewer N: The influence of a dominating centre on a quantitative systematic review of granisetron for preventing postoperative nausea and vomiting. *Acta Anaesthesiol Scand* 2001; 45:659-70
48. Cappelleri JC, Ioannidis JP, Schmid CH, de Ferranti SD, Aubert M, Chalmers TC, Lau J: Large trials *versus* meta-analysis of smaller trials: How do their results compare? *JAMA* 1996; 276:1332-8
49. Villar J, Carroli G, Belizan JM: Predictive ability of meta-analyses of randomised controlled trials. *Lancet* 1995; 345:772-6
